# Supplementary material for: Influence of Nisin-Biogel at Subinhibitory Concentrations on Virulence Expression in Staphylococcus aureus Isolates from Diabetic Foot Infections
Source: MDPI journal article supplement (doi:10.3390/antibiotics10121501), 2021-12-07
Supplement: s1 [file s1]

**Table S1** | Effects of nisin-biogel at 1/2 MIC, 1/4 MIC and 1/8 MIC and clindamycin at 1/2 MIC on *agrI*, *spA*, *atl*, *clfA*, *coa*, *icaA* and *icaD* mRNA expression for the isolates A 5.2, A 6.3, B 1.1, B 14.2, Z 1.1 and Z 5.2. Results are expressed as n-fold differences in ‘gene under study/*gyrB*’ ratio in the presence of the different conditions described above relative to ‘gene under study/*gyrB*’ ratio in the growth control (no antimicrobial). Values are present as mean values  $\pm$  SD (two repeated different experiments), except for the *clfA/gyrB* fold change for the isolate Z 5.2, since only one assay was performed. Asterisks indicate statistically significant differences between treatments and between treatments and control for each clinical isolate (\*= $p<0.05$ ; \*\*= $p<0.01$ ; \*\*\*= $p<0.001$ , compared with the results of the corresponding control).

| A 5.2                    | <i>agrI/gyrB</i><br>fold change | <i>spA/gyrB</i><br>fold change | <i>atl/gyrB</i> fold<br>change | <i>clfA/gyrB</i><br>fold change | <i>coa/gyrB</i><br>fold change | <i>icaA/gyrB</i> fold<br>change | <i>icaD/gyrB</i><br>fold change |
|--------------------------|---------------------------------|--------------------------------|--------------------------------|---------------------------------|--------------------------------|---------------------------------|---------------------------------|
| Only isolate             | 1.00 $\pm$ 0.00                 | 1.00 $\pm$ 0.00                | 1.00 $\pm$ 0.00                | 1.00 $\pm$ 0.00                 | 1.00 $\pm$ 0.00                | 1.00 $\pm$ 0.00                 | 1.00 $\pm$ 0.00                 |
| Isolate + 1/2<br>MIC CLI | 0.04 $\pm$ 0.01**               | 0.34 $\pm$ 0.08                | 2.10 $\pm$ 0.15                | 1.79 $\pm$ 0.00**               | 4.88 $\pm$ 3.60                | 0.33 $\pm$ 0.10                 | 0.48 $\pm$ 0.12                 |
| Isolate + 1/2<br>MIC NB  | 0.06 $\pm$ 0.03*                | 5.28 $\pm$ 1.81                | 1.11 $\pm$ 0.33                | 0.60 $\pm$ 0.24                 | 6.36 $\pm$ 0.35                | 0.79 $\pm$ 0.12                 | 1.13 $\pm$ 0.03                 |
| Isolate + 1/4<br>MIC NB  | 0.06 $\pm$ 0.03*                | 7.27 $\pm$ 3.75                | 1.09 $\pm$ 0.17                | 0.85 $\pm$ 0.37                 | 6.43 $\pm$ 1.50                | 0.83 $\pm$ 0.23                 | 1.30 $\pm$ 0.13                 |
| Isolate + 1/8<br>MIC NB  | 0.06 $\pm$ 0.01**               | 4.24 $\pm$ 0.25*               | 1.08 $\pm$ 0.34                | 0.45 $\pm$ 0.12                 | 3.26 $\pm$ 2.69                | 0.89 $\pm$ 0.19                 | 0.89 $\pm$ 0.34                 |
| B 14.2                   | <i>agrI/gyrB</i><br>fold change | <i>spA/gyrB</i><br>fold change | <i>atl/gyrB</i> fold<br>change | <i>clfA/gyrB</i><br>fold change | <i>coa/gyrB</i><br>fold change | <i>icaA/gyrB</i> fold<br>change | <i>icaD/gyrB</i><br>fold change |
| Only isolate             | 1.00 $\pm$ 0.00                 | 1.00 $\pm$ 0.00                | 1.00 $\pm$ 0.00                | 1.00 $\pm$ 0.00                 | 1.00 $\pm$ 0.00                | 1.00 $\pm$ 0.00                 | 1.00 $\pm$ 0.00                 |
| Isolate + 1/2<br>MIC CLI | 0.03 $\pm$ 0.02*                | 0.24 $\pm$ 0.04                | 1.87 $\pm$ 0.38                | 1.28 $\pm$ 0.23                 | 2.89 $\pm$ 1.15                | 1.08 $\pm$ 0.21                 | 1.10 $\pm$ 0.05                 |
| Isolate + 1/2<br>MIC NB  | 0.06 $\pm$ 0.02*                | 0.67 $\pm$ 0.17                | 0.87 $\pm$ 0.56                | 0.31 $\pm$ 0.12                 | 2.81 $\pm$ 0.23                | 0.79 $\pm$ 0.08                 | 0.77 $\pm$ 0.04                 |
| Isolate + 1/4<br>MIC NB  | 0.09 $\pm$ 0.02*                | 0.99 $\pm$ 0.31                | 0.83 $\pm$ 0.44                | 0.29 $\pm$ 0.03*                | 2.05 $\pm$ 0.76                | 0.67 $\pm$ 0.12                 | 0.86 $\pm$ 0.04                 |
| Isolate + 1/8<br>MIC NB  | 0.05 $\pm$ 0.03*                | 0.61 $\pm$ 0.23                | 0.38 $\pm$ 0.11                | 0.17 $\pm$ 0.03*                | 2.65 $\pm$ 0.12*               | 0.73 $\pm$ 0.04                 | 0.97 $\pm$ 0.07                 |
| Z 5.2                    | <i>agrI/gyrB</i><br>fold change | <i>spA/gyrB</i><br>fold change | <i>atl/gyrB</i> fold<br>change | <i>clfA/gyrB</i><br>fold change | <i>coa/gyrB</i><br>fold change | <i>icaA/gyrB</i> fold<br>change | <i>icaD/gyrB</i><br>fold change |
| Only isolate             | 1.00 $\pm$ 0.00                 | 1.00 $\pm$ 0.00                | 1.00 $\pm$ 0.00                | 1.00                            | 1.00 $\pm$ 0.00                | 1.00 $\pm$ 0.00                 | 1.00 $\pm$ 0.00                 |
| Isolate + 1/2<br>MIC CLI | 0.18 $\pm$ 0.09                 | 0.19 $\pm$ 0.06*               | 2.59 $\pm$ 1.77                | 5.54                            | 5.43 $\pm$ 4.19                | 0.40 $\pm$ 0.28                 | 0.43 $\pm$ 0.27                 |
| Isolate + 1/2<br>MIC NB  | 0.14 $\pm$ 0.02*                | 0.34 $\pm$ 0.07                | 0.69 $\pm$ 0.14                | 0.09                            | 4.67 $\pm$ 3.62                | 1.37 $\pm$ 0.29                 | 0.98 $\pm$ 0.00                 |
| Isolate + 1/4<br>MIC NB  | 0.15 $\pm$ 0.04*                | 0.36 $\pm$ 0.17                | 0.59 $\pm$ 0.09                | 0.34                            | 8.90 $\pm$ 8.12                | 1.49 $\pm$ 0.29                 | 1.06 $\pm$ 0.13                 |
| Isolate + 1/8<br>MIC NB  | 0.29 $\pm$ 0.1                  | 0.57 $\pm$ 0.33                | 0.55 $\pm$ 0.24                | 1.08                            | 7.83 $\pm$ 6.70                | 1.77 $\pm$ 0.53                 | 1.10 $\pm$ 0.15                 |
| A 6.3                    | <i>agrI/gyrB</i><br>fold change | <i>spA/gyrB</i><br>fold change | <i>atl/gyrB</i> fold<br>change | <i>clfA/gyrB</i><br>fold change | <i>coa/gyrB</i><br>fold change | <i>icaA/gyrB</i> fold<br>change | <i>icaD/gyrB</i><br>fold change |
| Only isolate             | 1.00 $\pm$ 0.00                 | 1.00 $\pm$ 0.00                | 1.00 $\pm$ 0.00                | 1.00 $\pm$ 0.00                 | 1.00 $\pm$ 0.00                | 1.00 $\pm$ 0.00                 | 1.00 $\pm$ 0.00                 |
| Isolate + 1/2<br>MIC CLI | 0.24 $\pm$ 0.15                 | 1.13 $\pm$ 0.68                | 2.08 $\pm$ 0.16                | 0.76 $\pm$ 0.07                 | 12.13 $\pm$ 2.45               | 0.17 $\pm$ 0.03                 | 0.23 $\pm$ 0.12                 |
| Isolate + 1/2<br>MIC NB  | 0.28 $\pm$ 0.07                 | 1.66 $\pm$ 1.17                | 0.75 $\pm$ 0.26                | 0.42 $\pm$ 0.07                 | 35.54 $\pm$ 15.73              | 1.10 $\pm$ 0.28                 | 1.80 $\pm$ 0.18                 |
| Isolate + 1/4<br>MIC NB  | 0.45 $\pm$ 0.20                 | 1.39 $\pm$ 0.49                | 0.71 $\pm$ 0.14                | 0.41 $\pm$ 0.07                 | 29.38 $\pm$ 3.46               | 1.57 $\pm$ 0.43                 | 2.28 $\pm$ 0.91                 |
| Isolate + 1/8<br>MIC NB  | 0.41 $\pm$ 0.17                 | 2.33 $\pm$ 0.75                | 0.68 $\pm$ 0.31                | 0.52 $\pm$ 0.13                 | 19.20 $\pm$ 2.71               | 1.64 $\pm$ 0.44                 | 1.80 $\pm$ 0.37                 |
| B 1.1                    | <i>agrI/gyrB</i><br>fold change | <i>spA/gyrB</i><br>fold change | <i>atl/gyrB</i> fold<br>change | <i>clfA/gyrB</i><br>fold change | <i>coa/gyrB</i><br>fold change | <i>icaA/gyrB</i> fold<br>change | <i>icaD/gyrB</i><br>fold change |
| Only isolate             | 1.00 $\pm$ 0.00                 | 1.00 $\pm$ 0.00                | 1.00 $\pm$ 0.00                | 1.00 $\pm$ 0.00                 | 1.00 $\pm$ 0.00                | 1.00 $\pm$ 0.00                 | 1.00 $\pm$ 0.00                 |
| Isolate + 1/2<br>MIC CLI | 0.20 $\pm$ 0.16                 | 0.29 $\pm$ 0.11                | 0.35 $\pm$ 0.26                | 1.32 $\pm$ 0.85                 | 7.54 $\pm$ 0.07**              | 1.55 $\pm$ 0.49                 | 1.33 $\pm$ 0.02*                |
| Isolate + 1/2<br>MIC NB  | 0.10 $\pm$ 0.05*                | 0.46 $\pm$ 0.10                | 0.14 $\pm$ 0.10                | 0.29 $\pm$ 0.21                 | 9.94 $\pm$ 3.05                | 0.73 $\pm$ 0.09                 | 1.04 $\pm$ 0.06                 |
| Isolate + 1/4<br>MIC NB  | 0.13 $\pm$ 0.04*                | 0.71 $\pm$ 0.42                | 0.11 $\pm$ 0.07                | 0.28 $\pm$ 0.15                 | 7.73 $\pm$ 1.59                | 0.91 $\pm$ 0.07                 | 1.14 $\pm$ 0.01*                |

|                                  |                                                |                                               |                                               |                                                |                                               |                                                |                                                |
|----------------------------------|------------------------------------------------|-----------------------------------------------|-----------------------------------------------|------------------------------------------------|-----------------------------------------------|------------------------------------------------|------------------------------------------------|
| <b>Isolate + 1/8<br/>MIC NB</b>  | 0.20±0.03*                                     | 0.98±0.47                                     | 0.14±0.10                                     | 0.33±0.11                                      | 8.09±0.48*                                    | 1.40±0.30                                      | 1.60±0.45                                      |
| <b>Z 1.1</b>                     | <b><i>agrI</i>/<i>gyrB</i><br/>fold change</b> | <b><i>spA</i>/<i>gyrB</i><br/>fold change</b> | <b><i>atl</i>/<i>gyrB</i> fold<br/>change</b> | <b><i>clfA</i>/<i>gyrB</i><br/>fold change</b> | <b><i>coa</i>/<i>gyrB</i><br/>fold change</b> | <b><i>icaA</i>/<i>gyrB</i> fold<br/>change</b> | <b><i>icaD</i>/<i>gyrB</i><br/>fold change</b> |
| <b>Only isolate</b>              | 1.00±0.00                                      | 1.00±0.00                                     | 1.00±0.00                                     | 1.00±0.00                                      | 1.00±0.00                                     | 1.00±0.00                                      | 1.00±0.00                                      |
| <b>Isolate + 1/2<br/>MIC CLI</b> | 0.07±0.04*                                     | 0.19±0.08                                     | 0.57±0.01*                                    | 0.82±0.20                                      | 1.46±0.02*                                    | 0.64±0.61                                      | 1.19±0.09                                      |
| <b>Isolate + 1/2<br/>MIC NB</b>  | 0.14±0.03                                      | 2.01±0.54                                     | 0.23±0.05*                                    | 0.27±0.04*                                     | 2.71±0.16                                     | 0.98±0.22                                      | 0.94±0.05                                      |
| <b>Isolate + 1/4<br/>MIC NB</b>  | 0.13±0.09                                      | 1.10±0.19                                     | 0.18±0.06*                                    | 0.24±0.11                                      | 2.73±0.57                                     | 1.17±0.48                                      | 0.99±0.04                                      |
| <b>Isolate + 1/8<br/>MIC NB</b>  | 0.15±0.04                                      | 1.03±0.19                                     | 0.28±0.09                                     | 0.27±0.08                                      | 2.43±0.05*                                    | 1.52±0.19                                      | 1.99±0.02**                                    |

NB: nisin-biogel; CLI: clindamycin; MIC: minimum inhibitory concentration. *agrI*: accessory gene regulator I; *spA*: gene encoding staphylococcal protein A; *atl*: gene encoding autolysin; *clfA*: gene encoding clumping factor A; *coa*: gene encoding coagulase; *icaA*: gene encoding intracellular adhesin A; *icaD*: gene encoding intracellular adhesin D; *gyrB*: gene encoding gyrase B.

**Table S2** | Effects of nisin-biogel at 1/2 MIC, 1/4 MIC and 1/8 MIC and clindamycin at 1/2 MIC on biofilm formation by the isolates A 5.2, A 6.3, B 1.1, B 14.2, Z 1.1 and Z 5.2. Values are present as mean values  $\pm$  SD (three repeated different experiments). \*= $p<0.05$ ; \*\*= $p<0.01$ ; \*\*\*= $p<0.001$ , compared with the results of the corresponding control.

|               | Only isolate    | Isolate + 1/2<br>MIC CLI | Isolate + 1/2<br>MIC NB | Isolate + 1/4<br>MIC NB | Isolate + 1/8<br>MIC NB |
|---------------|-----------------|--------------------------|-------------------------|-------------------------|-------------------------|
| <b>A 5.2</b>  | 0.49 $\pm$ 0.08 | 0.49 $\pm$ 0.15          | 0.28 $\pm$ 0.04         | 0.34 $\pm$ 0.01         | 0.46 $\pm$ 0.10         |
| <b>B 14.2</b> | 0.21 $\pm$ 0.06 | 0.25 $\pm$ 0.03          | 0.37 $\pm$ 0.09         | 0.39 $\pm$ 0.11         | 0.54 $\pm$ 0.13         |
| <b>Z 5.2</b>  | 0.25 $\pm$ 0.04 | 0.27 $\pm$ 0.05          | 0.21 $\pm$ 0.04         | 0.33 $\pm$ 0.05**       | 0.44 $\pm$ 0.16         |
| <b>A 6.3</b>  | 0.36 $\pm$ 0.10 | 0.31 $\pm$ 0.03          | 0.40 $\pm$ 0.06         | 0.36 $\pm$ 0.13         | 0.44 $\pm$ 0.18         |
| <b>B 1.1</b>  | 0.23 $\pm$ 0.02 | 0.24 $\pm$ 0.02          | 0.26 $\pm$ 0.12         | 0.38 $\pm$ 0.06         | 0.50 $\pm$ 0.17         |
| <b>Z 1.1</b>  | 0.25 $\pm$ 0.02 | 0.37 $\pm$ 0.08          | 0.27 $\pm$ 0.04         | 0.30 $\pm$ 0.12         | 0.35 $\pm$ 0.11         |

NB: nisin-biogel; CLI: clindamycin; MIC: minimum inhibitory concentration.

**Table S3** | Effects of nisin-biogel at 1/2 MIC, 1/4 MIC and 1/8 MIC and clindamycin at 1/2 MIC on coagulase production by the isolates A 5.2, A 6.3, B 1.1, B 14.2, Z 1.1 and Z 5.2 after 4h of growth under the different conditions tested. Coagulation ability was measured every hour for 4h of incubation, and after 24h of incubation. -: no evidence of fibrin formation; 1+: small unorganized clots; 2+: small organized clots; 3+: large organized clots; 4+: entire content of tube coagulates and is not displaced when tube is inverted.

|                  | Only isolate | Isolate + 1/2<br>MIC CLI | Isolate + 1/2<br>MIC NB | Isolate + 1/4<br>MIC NB | Isolate + 1/8<br>MIC NB |
|------------------|--------------|--------------------------|-------------------------|-------------------------|-------------------------|
| <b>A 5.2 E1</b>  | 1h --        | 1h --                    | 1h --                   | 1h - 1+                 | 1h - 2+                 |
|                  | 2h - 3+      | 2h --                    | 2h - 2+                 | 2h - 4+                 | 2h - 4+                 |
|                  | 3h - 3+      | 3h --                    | 3h - 3+                 | 3h - 4+                 | 3h - 4+                 |
|                  | 4h - 3+      | 4h --                    | 4h - 3+                 | 4h - 4+                 | 4h - 4+                 |
|                  | 24h - 4+     | 24h - 4+                 | 24h - 3+                | 24h - 4+                | 24h - 4+                |
| <b>A 5.2 E2</b>  | 1h --        | 1h --                    | 1h --                   | 1h --                   | 1h --                   |
|                  | 2h - 3+      | 2h --                    | 2h --                   | 2h - 3+                 | 2h - 3+                 |
|                  | 3h - 3+      | 3h --                    | 3h - 2+                 | 3h - 3+                 | 3h - 3+                 |
|                  | 4h - 4+      | 4h --                    | 4h - 2+                 | 4h - 3+                 | 4h - 3+                 |
|                  | 24h - 4+     | 24h - 4+                 | 24h - 4+                | 24h - 4+                | 24h - 4+                |
| <b>B 14.2 E1</b> | 1h --        | 1h --                    | 1h --                   | 1h - 1+                 | 1h - 2+                 |
|                  | 2h - 1+      | 2h --                    | 2h --                   | 2h - 3+                 | 2h - 3+                 |
|                  | 3h - 3+      | 3h --                    | 3h --                   | 3h - 3+                 | 3h - 3+                 |
|                  | 4h - 4+      | 4h --                    | 4h - 1+                 | 4h - 3+                 | 4h - 3+                 |
|                  | 24h - 4+     | 24h - 4+                 | 24h - 3+                | 24h - 4+                | 24h - 4+                |
| <b>B 14.2 E2</b> | 1h --        | 1h --                    | 1h --                   | 1h --                   | 1h --                   |
|                  | 2h - 2+      | 2h --                    | 2h --                   | 2h --                   | 2h - 3+                 |
|                  | 3h - 2+      | 3h --                    | 3h --                   | 3h --                   | 3h - 3+                 |
|                  | 4h - 2+      | 4h - 1+                  | 4h --                   | 4h - 2+                 | 4h - 3+                 |
|                  | 24h - 3+     | 24h - 4+                 | 24h - 3+                | 24h - 3+                | 24h - 3+                |
| <b>Z 5.2 E1</b>  | 1h - 2+      | 1h --                    | 1h --                   | 1h --                   | 1h --                   |
|                  | 2h - 4+      | 2h --                    | 2h --                   | 2h --                   | 2h - 4+                 |
|                  | 3h - 4+      | 3h --                    | 3h --                   | 3h --                   | 3h - 4+                 |
|                  | 4h - 4+      | 4h --                    | 4h --                   | 4h - 1+                 | 4h - 4+                 |
|                  | 24h - 4+     | 24h - 4+                 | 24h - 4+                | 24h - 4+                | 24h - 4+                |
| <b>Z 5.2 E2</b>  | 1h - 2+      | 1h --                    | 1h --                   | 1h --                   | 1h --                   |
|                  | 2h - 3+      | 2h --                    | 2h --                   | 2h --                   | 2h - 3+                 |
|                  | 3h - 3+      | 3h --                    | 3h --                   | 3h --                   | 3h - 3+                 |
|                  | 4h - 3+      | 4h --                    | 4h --                   | 4h --                   | 4h - 3+                 |
|                  | 24h - 3+     | 24h - 3+                 | 24h - 3+                | 24h - 3+                | 24h - 3+                |
| <b>A 6.3 E1</b>  | 1h --        | 1h --                    | 1h --                   | 1h --                   | 1h - 1+                 |
|                  | 2h --        | 2h --                    | 2h --                   | 2h - 2+                 | 2h - 4+                 |
|                  | 3h - 4+      | 3h --                    | 3h --                   | 3h - 3+                 | 3h - 4+                 |
|                  | 4h - 4+      | 4h --                    | 4h - 2+                 | 4h - 3+                 | 4h - 4+                 |
|                  | 24h - 4+     | 24h - 4+                 | 24h - 4+                | 24h - 4+                | 24h - 4+                |
| <b>A 6.3 E2</b>  | 1h --        | 1h --                    | 1h --                   | 1h --                   | 1h --                   |
|                  | 2h - 1+      | 2h --                    | 2h --                   | 2h --                   | 2h - 1+                 |
|                  | 3h - 3+      | 3h --                    | 3h --                   | 3h - 1+                 | 3h - 3+                 |
|                  | 4h - 3+      | 4h --                    | 4h --                   | 4h - 2+                 | 4h - 3+                 |
|                  | 24h - 4+     | 24h - 4+                 | 24h - 3+                | 24h - 4+                | 24h - 4+                |
| <b>B 1.1 E1</b>  | 1h - 2+      | 1h --                    | 1h - 2+                 | 1h - 3+                 | 1h - 3+                 |
|                  | 2h - 3+      | 2h --                    | 2h - 3+                 | 2h - 3+                 | 2h - 3+                 |
|                  | 3h - 3+      | 3h --                    | 3h - 3+                 | 3h - 3+                 | 3h - 3+                 |
|                  | 4h - 3+      | 4h --                    | 4h - 3+                 | 4h - 3+                 | 4h - 3+                 |
|                  | 24h - 4+     | 24h - 4+                 | 24h - 4+                | 24h - 4+                | 24h - 4+                |
| <b>B 1.1 E2</b>  | 1h --        | 1h --                    | 1h --                   | 1h --                   | 1h - 1+                 |
|                  | 2h - 3+      | 2h --                    | 2h --                   | 2h - 3+                 | 2h - 3+                 |
|                  | 3h - 4+      | 3h --                    | 3h --                   | 3h - 3+                 | 3h - 3+                 |
|                  | 4h - 4+      | 4h --                    | 4h - 1+                 | 4h - 3+                 | 4h - 3+                 |
|                  | 24h - 4+     | 24h - 4+                 | 24h - 4+                | 24h - 4+                | 24h - 4+                |

|                 |          |          |          |          |          |
|-----------------|----------|----------|----------|----------|----------|
| <b>Z 1.1 E1</b> | 1h – 3+  | 1h – –   | 1h – 2+  | 1h – 3+  | 1h – 3+  |
|                 | 2h – 3+  | 2h – –   | 2h – 3+  | 2h – 3+  | 2h – 3+  |
|                 | 3h – 3+  | 3h – –   | 3h – 3+  | 3h – 3+  | 3h – 3+  |
|                 | 4h – 3+  | 4h – –   | 4h – 3+  | 4h – 3+  | 4h – 3+  |
|                 | 24h – 4+ |
| <b>Z 1.1 E2</b> | 1h – 3+  | 1h – –   | 1h – –   | 1h – 1+  | 1h – 3+  |
|                 | 2h – 3+  | 2h – –   | 2h – –   | 2h – 3+  | 2h – 3+  |
|                 | 3h – 3+  | 3h – –   | 3h – –   | 3h – 3+  | 3h – 3+  |
|                 | 4h – 3+  | 4h – –   | 4h – 1+  | 4h – 3+  | 4h – 3+  |
|                 | 24h – 4+ |

NB: nisin-biogel; CLI: clindamycin; MIC: minimum inhibitory concentration.

**Table S4** | Effects of nisin-biogel at 1/2 MIC, 1/4 MIC and 1/8 MIC and clindamycin at 1/2 MIC on coagulase production by the isolates A 5.2, A 6.3, B 1.1, B 14.2, Z 1.1 and Z 5.2 after 24h of growth under the different conditions tested. Coagulation ability was measured every hour for 4h of incubation, and after 24h of incubation. -: no evidence of fibrin formation; 1+: small unorganized clots; 2+: small organized clots; 3+: large organized clots; 4+: entire content of tube coagulates and is not displaced when tube is inverted.

|                  | Only isolate | Isolate + 1/2<br>MIC CLI | Isolate + 1/2<br>MIC NB | Isolate + 1/4<br>MIC NB | Isolate + 1/8<br>MIC NB |
|------------------|--------------|--------------------------|-------------------------|-------------------------|-------------------------|
| <b>A 5.2 E1</b>  | 1h – 4+      | 1h – -                   | 1h – 2+                 | 1h – 4+                 | 1h – 4+                 |
|                  | 2h – 4+      | 2h – -                   | 2h – 2+                 | 2h – 4+                 | 2h – 4+                 |
|                  | 3h – 4+      | 3h – -                   | 3h – 3+                 | 3h – 4+                 | 3h – 4+                 |
|                  | 4h – 4+      | 4h – -                   | 4h – 3+                 | 4h – 4+                 | 4h – 4+                 |
|                  | 24h – 4+     | 24h – -                  | 24h – 3+                | 24h – 4+                | 24h – 4+                |
| <b>A 5.2 E2</b>  | 1h – 2+      | 1h – -                   | 1h – 2+                 | 1h – 3+                 | 1h – 2+                 |
|                  | 2h – 3+      | 2h – -                   | 2h – 3+                 | 2h – 3+                 | 2h – 3+                 |
|                  | 3h – 3+      | 3h – -                   | 3h – 3+                 | 3h – 3+                 | 3h – 3+                 |
|                  | 4h – 3+      | 4h – -                   | 4h – 3+                 | 4h – 3+                 | 4h – 3+                 |
|                  | 24h – 3+     | 24h – -                  | 24h – 3+                | 24h – 3+                | 24h – 3+                |
| <b>B 14.2 E1</b> | 1h – 4+      | 1h – 4+                  | 1h – 2+                 | 1h – 4+                 | 1h – 4+                 |
|                  | 2h – 4+      | 2h – 4+                  | 2h – 3+                 | 2h – 4+                 | 2h – 4+                 |
|                  | 3h – 4+      | 3h – 4+                  | 3h – 3+                 | 3h – 4+                 | 3h – 4+                 |
|                  | 4h – 4+      | 4h – 4+                  | 4h – 3+                 | 4h – 4+                 | 4h – 4+                 |
|                  | 24h – 4+     | 24h – 4+                 | 24h – 3+                | 24h – 4+                | 24h – 4+                |
| <b>B 14.2 E2</b> | 1h – 2+      | 1h – 3+                  | 1h – 2+                 | 1h – 2+                 | 1h – 2+                 |
|                  | 2h – 3+      | 2h – 3+                  | 2h – 3+                 | 2h – 3+                 | 2h – 3+                 |
|                  | 3h – 3+      | 3h – 3+                  | 3h – 3+                 | 3h – 3+                 | 3h – 3+                 |
|                  | 4h – 3+      | 4h – 3+                  | 4h – 3+                 | 4h – 3+                 | 4h – 3+                 |
|                  | 24h – 3+     | 24h – 3+                 | 24h – 3+                | 24h – 3+                | 24h – 3+                |
| <b>Z 5.2 E1</b>  | 1h – 4+      | 1h – -                   | 1h – 4+                 | 1h – 4+                 | 1h – 3+                 |
|                  | 2h – 4+      | 2h – -                   | 2h – 4+                 | 2h – 4+                 | 2h – 3+                 |
|                  | 3h – 4+      | 3h – -                   | 3h – 4+                 | 3h – 4+                 | 3h – 3+                 |
|                  | 4h – 4+      | 4h – -                   | 4h – 4+                 | 4h – 4+                 | 4h – 3+                 |
|                  | 24h – 4+     | 24h – -                  | 24h – 2+                | 24h – 3+                | 24h – 3+                |
| <b>Z 5.2 E2</b>  | 1h – 2+      | 1h – -                   | 1h – 2+                 | 1h – 2+                 | 1h – 2+                 |
|                  | 2h – 3+      | 2h – -                   | 2h – 3+                 | 2h – 3+                 | 2h – 3+                 |
|                  | 3h – 3+      | 3h – -                   | 3h – 3+                 | 3h – 3+                 | 3h – 3+                 |
|                  | 4h – 3+      | 4h – -                   | 4h – 3+                 | 4h – 3+                 | 4h – 3+                 |
|                  | 24h – 3+     | 24h – -                  | 24h – 3+                | 24h – 3+                | 24h – 3+                |
| <b>A 6.3 E1</b>  | 1h – 2+      | 1h – -                   | 1h – 2+                 | 1h – 2+                 | 1h – 2+                 |
|                  | 2h – 3+      | 2h – -                   | 2h – 3+                 | 2h – 3+                 | 2h – 3+                 |
|                  | 3h – 3+      | 3h – -                   | 3h – 3+                 | 3h – 3+                 | 3h – 3+                 |
|                  | 4h – 3+      | 4h – -                   | 4h – 3+                 | 4h – 3+                 | 4h – 3+                 |
|                  | 24h – 4+     | 24h – -                  | 24h – 4+                | 24h – 4+                | 24h – 3+                |
| <b>A 6.3 E2</b>  | 1h – 3+      | 1h – -                   | 1h – 3+                 | 1h – 3+                 | 1h – 3+                 |
|                  | 2h – 3+      | 2h – -                   | 2h – 3+                 | 2h – 3+                 | 2h – 3+                 |
|                  | 3h – 3+      | 3h – -                   | 3h – 3+                 | 3h – 3+                 | 3h – 3+                 |
|                  | 4h – 3+      | 4h – -                   | 4h – 3+                 | 4h – 3+                 | 4h – 3+                 |
|                  | 24h – 4+     | 24h – -                  | 24h – 4+                | 24h – 4+                | 24h – 4+                |
| <b>B 1.1 E1</b>  | 1h – 2+      | 1h – 2+                  | 1h – 4+                 | 1h – 2+                 | 1h – 2+                 |
|                  | 2h – 3+      | 2h – 4+                  | 2h – 4+                 | 2h – 3+                 | 2h – 3+                 |
|                  | 3h – 3+      | 3h – 4+                  | 3h – 4+                 | 3h – 3+                 | 3h – 3+                 |
|                  | 4h – 3+      | 4h – 4+                  | 4h – 4+                 | 4h – 3+                 | 4h – 3+                 |
|                  | 24h – 3+     | 24h – 4+                 | 24h – 4+                | 24h – 3+                | 24h – 3+                |
| <b>B 1.1 E2</b>  | 1h – 3+      | 1h – 3+                  | 1h – 3+                 | 1h – 3+                 | 1h – 3+                 |
|                  | 2h – 3+      | 2h – 3+                  | 2h – 3+                 | 2h – 3+                 | 2h – 3+                 |
|                  | 3h – 3+      | 3h – 3+                  | 3h – 3+                 | 3h – 3+                 | 3h – 3+                 |
|                  | 4h – 3+      | 4h – 3+                  | 4h – 3+                 | 4h – 3+                 | 4h – 3+                 |
|                  | 24h – 4+     | 24h – 4+                 | 24h – 4+                | 24h – 4+                | 24h – 4+                |
| <b>Z 1.1 E1</b>  | 1h – 2+      | 1h – -                   | 1h – 3+                 | 1h – 4+                 | 1h – 4+                 |
|                  | 2h – 3+      | 2h – 3+                  | 2h – 4+                 | 2h – 4+                 | 2h – 4+                 |
|                  | 3h – 3+      | 3h – 3+                  | 3h – 4+                 | 3h – 4+                 | 3h – 4+                 |
|                  | 4h – 3+      | 4h – 3+                  | 4h – 4+                 | 4h – 4+                 | 4h – 4+                 |

|                 |          |          |          |          |          |
|-----------------|----------|----------|----------|----------|----------|
|                 | 24h – 3+ | 24h – 3+ | 24h – 4+ | 24h – 4+ | 24h – 4+ |
| <b>Z 1.1 E2</b> | 1h – 3+  |
|                 | 2h – 3+  |
|                 | 3h – 3+  |
|                 | 4h – 3+  |
|                 | 24h – 3+ | 24h – 4+ | 24h – 3+ | 24h – 3+ | 24h – 3+ |

NB: nisin-biogel; CLI: clindamycin; MIC: minimum inhibitory concentration.

**Table S5** | Effects of nisin-biogel at 1/2 MIC, 1/4 MIC and 1/8 MIC and clindamycin at 1/2 MIC on protein A release by *S. aureus* DFI isolates A 5.2, A 6.3, B 1.1, B 14.2, Z 1.1 and Z 5.2 after 18h of growth under the different conditions tested. The results are the ratios of the amount of SpA (pg/mL) in the bacterial supernatants incubated with nisin-biogel or clindamycin to the amount of SpA (pg/mL) in the bacterial supernatants incubated without antimicrobials and are expressed as percentages.

|                         | A 5.2 | A 6.3 | B 1.1 | B 14.2 | Z 1.1 | Z 5.2 |
|-------------------------|-------|-------|-------|--------|-------|-------|
| <b>No antimicrobial</b> | 100%  | 100%  | 100%  | 100%   | 100%  | 100%  |
| <b>1/2 MIC CLI</b>      | 49%   | 150%  | 55%   | 79%    | 42%   | 113%  |
| <b>1/2 MIC NB</b>       | 74%   | 95%   | 61%   | 46%    | 56%   | 109%  |
| <b>1/4 MIC NB</b>       | 77%   | 98%   | 111%  | 69%    | 68%   | 96%   |
| <b>1/8 MIC NB</b>       | 105%  | 91%   | 130%  | 66%    | 62%   | 86%   |

NB: nisin-biogel; CLI: clindamycin



**Table S6** | Primers used in RT-qPCR protocols using 7300 Real Time PCR System for accessing virulence gene expression.

| Primer        | Sequence (5'-3')                    | Reference                  |
|---------------|-------------------------------------|----------------------------|
| <i>gyrB</i> F | GGTGGCGACTTTGATCTAGC                | Otto et al., 2013 [41]     |
| <i>gyrB</i> R | TTATACAACGGTGGCTGTGC                | Otto et al., 2013 [41]     |
| <i>agrI</i> F | CCAGCTATAATTAGTGGTATTAAGTACAGTAAACT | Francois et al., 2006 [50] |
| <i>agrI</i> R | AGGACGCGCTATCAAACATTTT              | Francois et al., 2006 [50] |
| <i>spA</i> F  | TATGCCTAACTTAAATGCTG                | Otto et al., 2013 [41]     |
| <i>spA</i> R  | TTGGAGCTTGAGAGTCATTA                | Otto et al., 2013 [41]     |
| <i>atl</i> F  | ACCAAGATCAGTTGCTGCAA                | This study                 |
| <i>atl</i> R  | CGGTATGCGTATTTAGGGAAGT              | This study                 |
| <i>clfA</i> F | ACCCAGGTTCAAGATTCTGGCAGCG           | Atshan et al., 2013 [51]   |
| <i>clfA</i> R | TCGCTGAGTCGGAATCGCTTGCT             | Atshan et al., 2013 [51]   |
| <i>coa</i> F  | GTAGATTGGGCAATTACATTTTGGAGG         | Kearns et al., 1999 [52]   |
| <i>coa</i> R  | CGCATCAGCTTTGTTATCCCATGT            | Kearns et al., 1999 [52]   |
| <i>icaA</i> F | GAGGTAAAGCCAACGCACTC                | Atshan et al., 2013 [51]   |
| <i>icaA</i> R | CCTGTTAACCGCACCAAGTTT               | Atshan et al., 2013 [51]   |
| <i>icaD</i> F | ACCCAACGCTAAAATCATCG                | Atshan et al., 2013 [51]   |
| <i>icaD</i> R | GCGAAAATGCCCATAGTTTC                | Atshan et al., 2013 [51]   |

*gyrB*: gene encoding gyrase B; *agrI*: accessory gene regulator I; *spA*: gene encoding protein A; *atl*: gene encoding autolysin; *clfA*: gene encoding clumping factor A; *coa*: gene encoding coagulase; *icaA*: gene encoding intracellular adhesin A; *icaD*: gene encoding intracellular adhesin D.
